# Supplementary material for: p–d Orbital hybrid Ni–Al NC catalyst withstanding potential variations in highly selective electro-reduction of CO2 to CO
Source: Royal Society of Chemistry journal article supplement (doi:10.1039/d3nj04215d), 2024-01-01
Supplement: d3nj04215d1.pdf [file d3nj04215d1.pdf]

## Electronic Supporting Information (ESI)

*p*-*d* Orbital hybrid Ni-Al NC catalyst withstand potential variations in highly selective electro-reduction of CO<sub>2</sub> to CO

Linjie Wang,<sup>a</sup> Da Zhang,<sup>a</sup> Shaojuan Luo,<sup>\*a,c</sup> Yong Xu,<sup>b</sup> and Chuande Wu<sup>\*d</sup>

<sup>a</sup>School of Chemical Engineering and Light Industry, Guangdong University of Technology, Guangzhou 510006, China.

<sup>b</sup>Guangzhou Key Laboratory of Low-Dimensional Materials and Energy Storage Devices, Collaborative Innovation Center of Advanced Energy Materials, School of Materials and Energy, Guangdong University of Technology, Guangzhou 510006, China.

<sup>c</sup>Jieyang Branch of Chemistry and Chemical Engineering Guangdong Laboratory, Rongjiang Laboratory, Jieyang, 515200, China.

<sup>d</sup>Department of Chemistry, Zhejiang University, Hangzhou 310000, China.

\*Corresponding author kesjluo@gdut.edu.cn

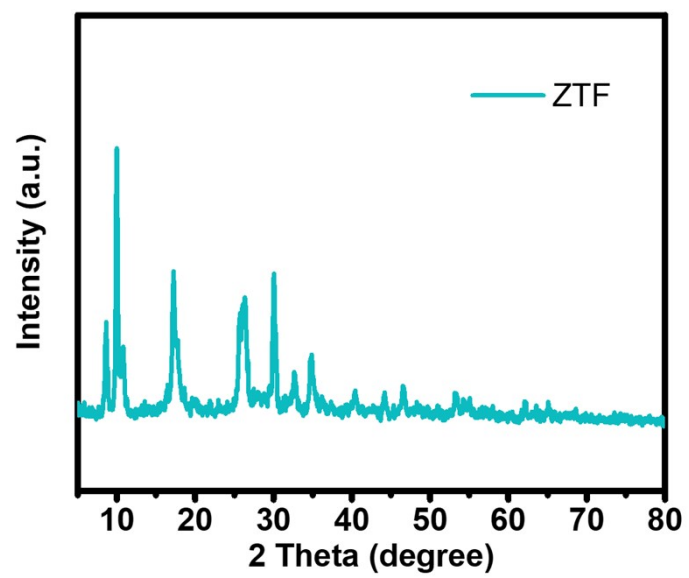

**Figure S1.** XRD pattern of ZTF.

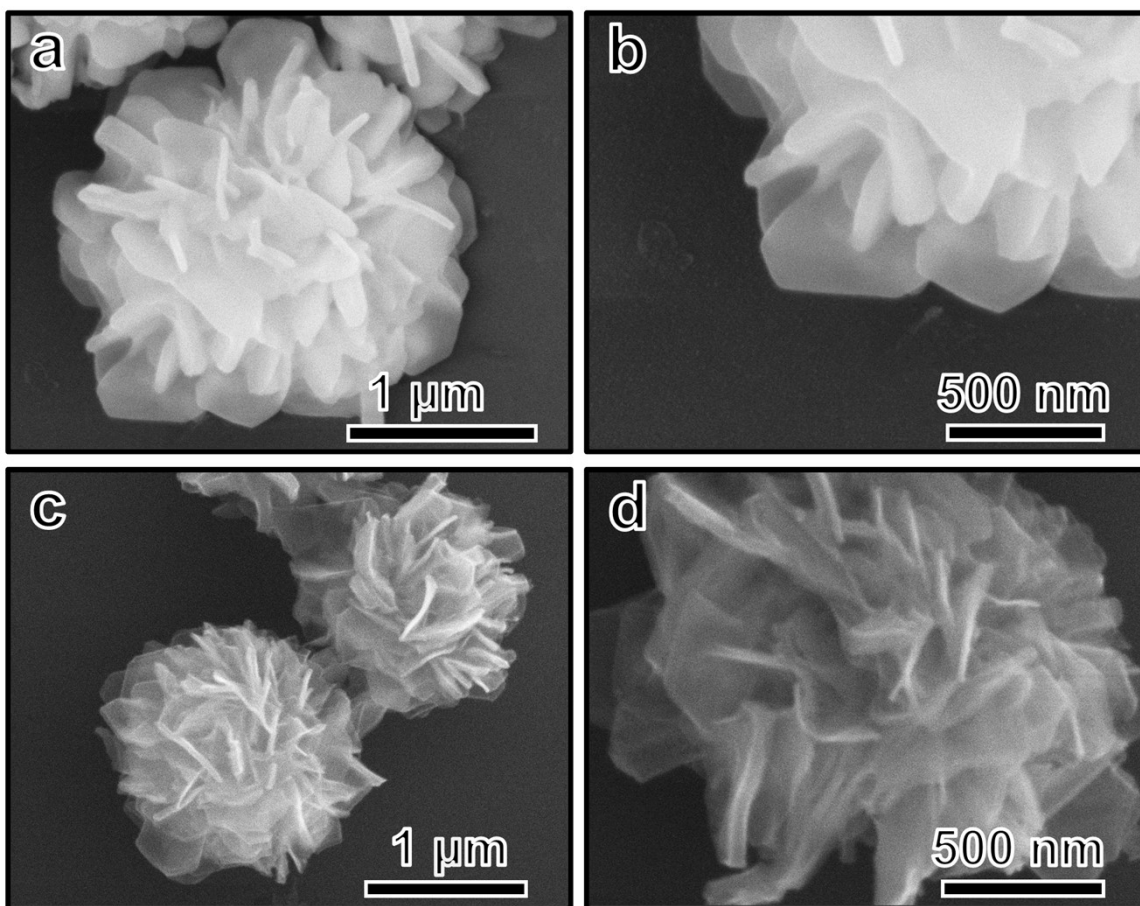

**Figure S2.** SEM images of (a-b) ZTF and (c-d) NC.

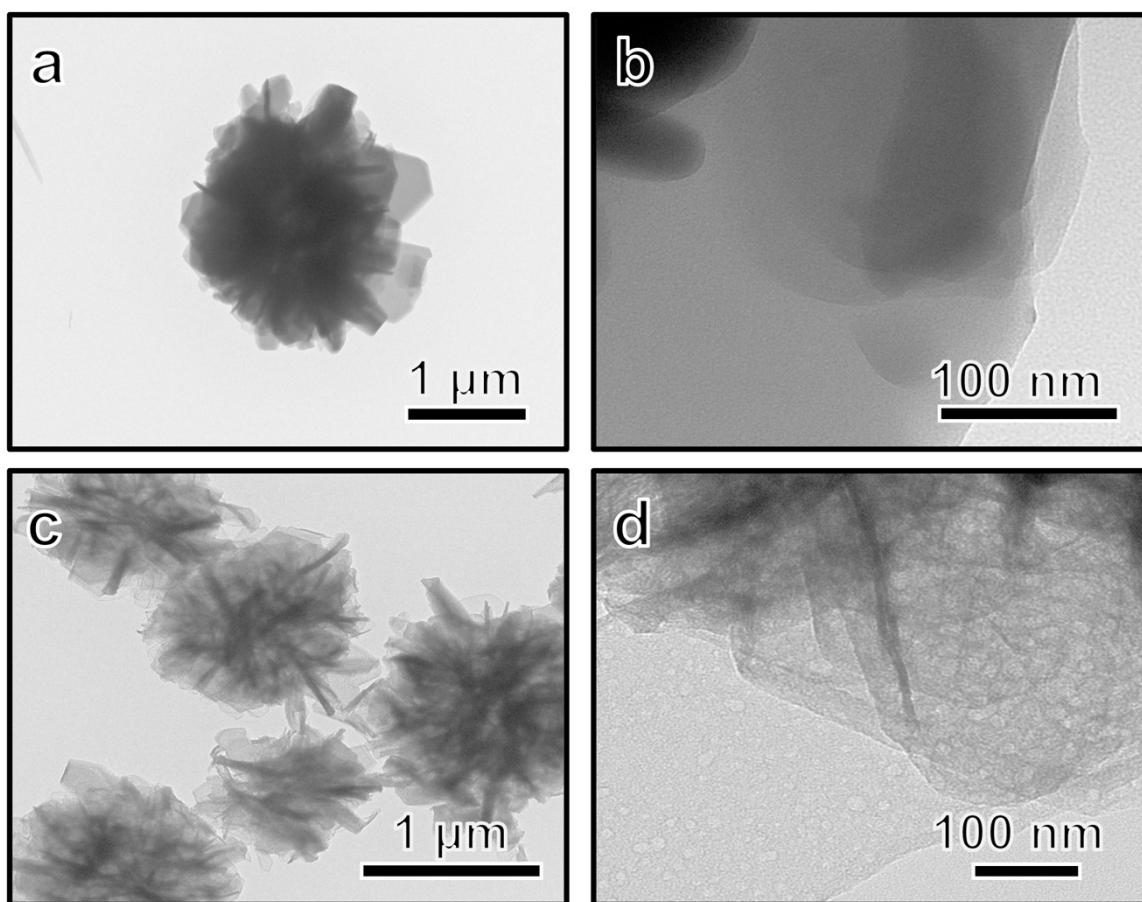

**Figure S3.** TEM images of (a-b) ZTF and (c-d) NC.

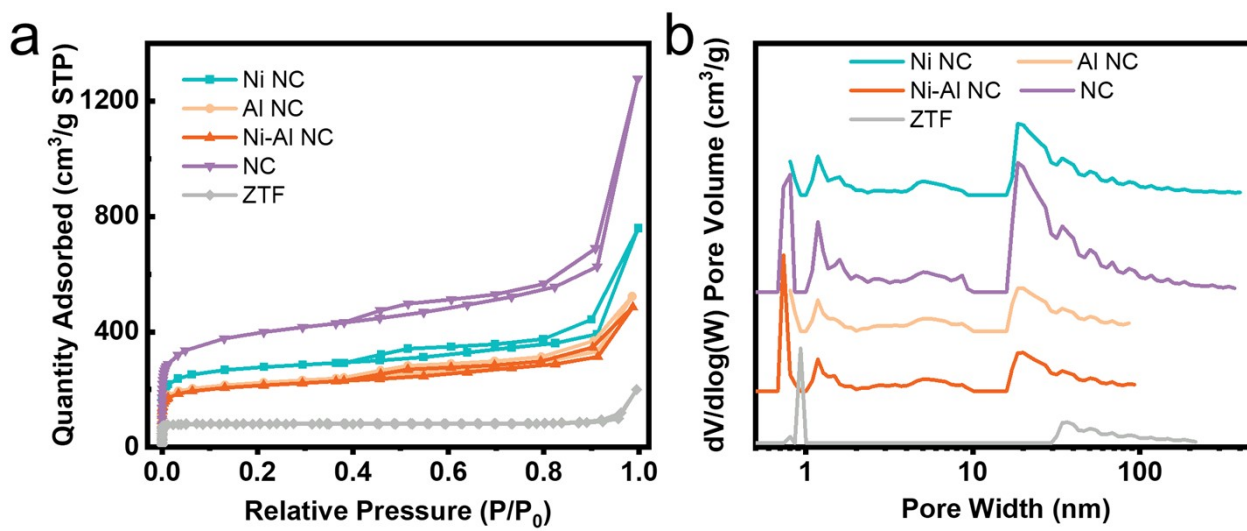

**Figure S4.** (a)  $N_2$  adsorption-desorption isotherms of ZTF, NC, Ni NC, Al NC, and Ni-Al NC; (b) pore structures of ZTF, NC, Ni NC, Al NC, and Ni-Al NC.

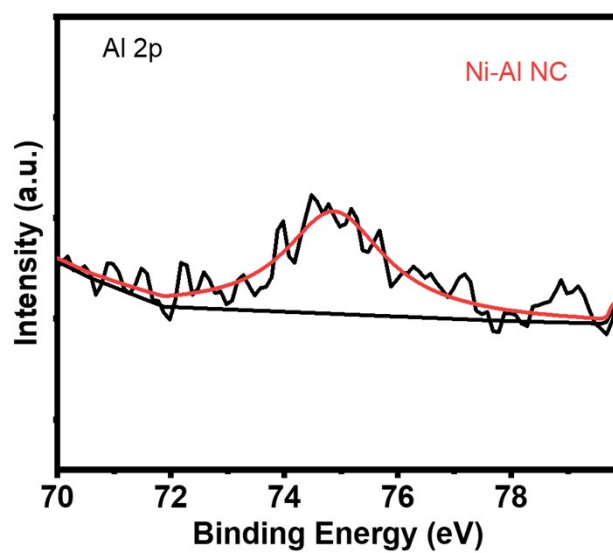

**Figure S5.** High-resolution XPS spectrum of the Al 2p of Ni-Al NC.

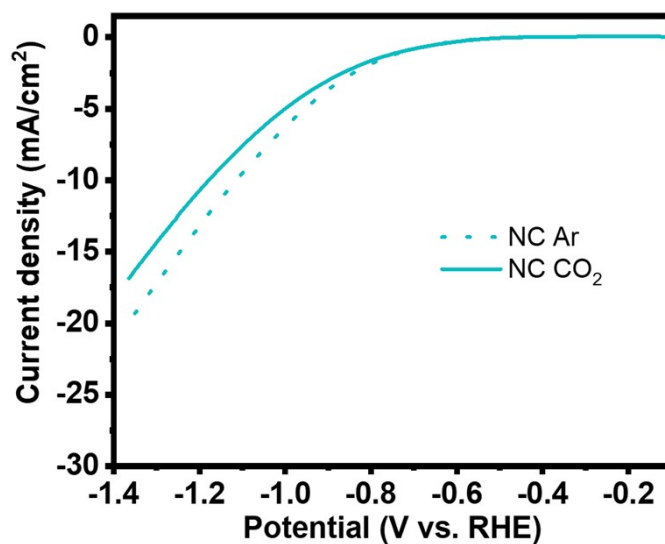

**Figure S6.** The LSV curves of support NC in the Ar-saturated (dotted line) and CO<sub>2</sub>-saturated (solid line) 0.1 M KHCO<sub>3</sub> electrolyte.

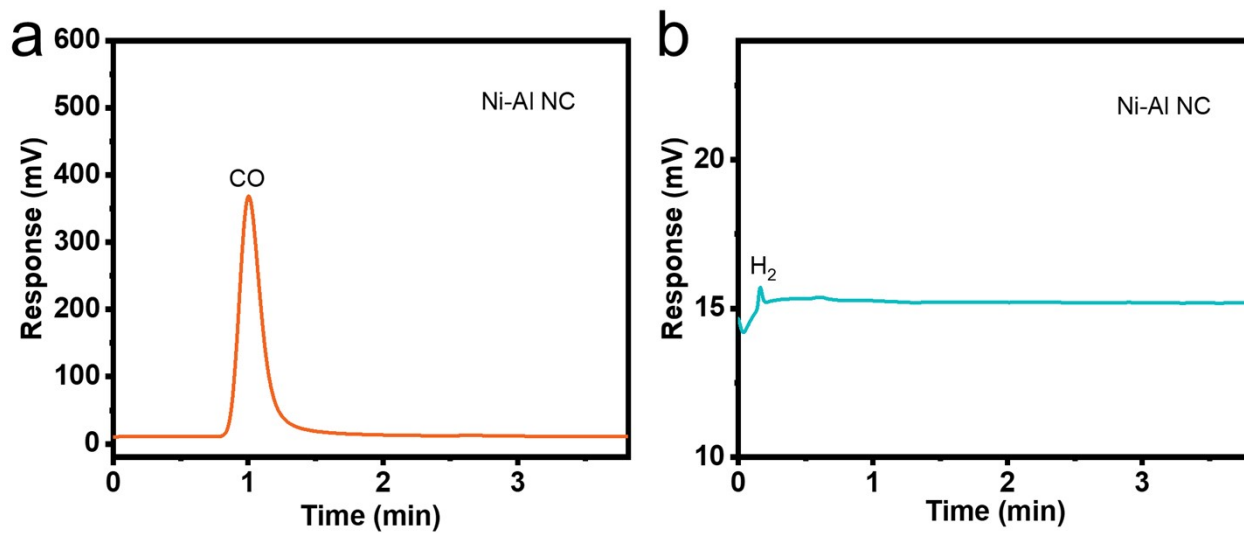

**Figure S7.** Representative spectra of (a) flame ionization detector (FID) and (b) thermal conductivity detector (TCD) taken for the Ni-Al NC at  $-0.7$  V vs. RHE.



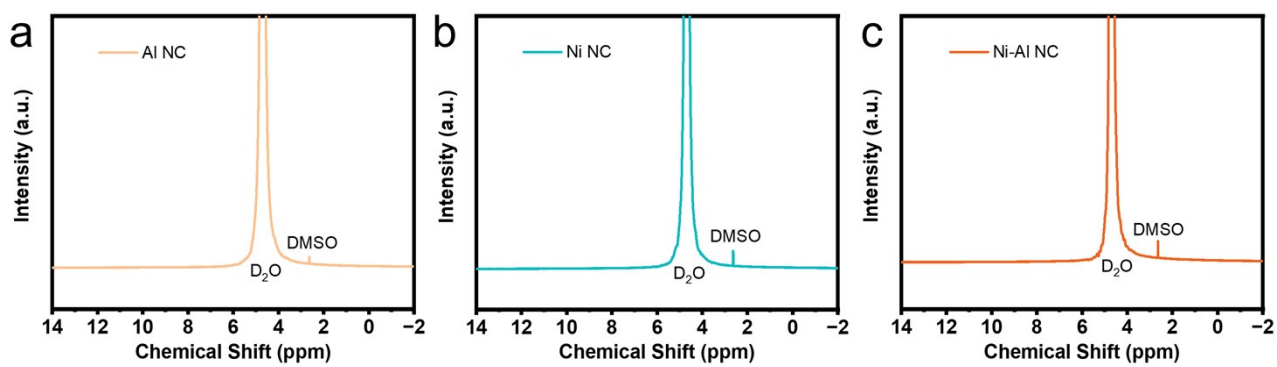

**Figure S8.**  $^1\text{H}$  NMR spectra of the liquid product obtained over (a) Ni NC, (b) Al NC, and (c) Ni-Al NC after 1 h CO reduction at  $-0.7$  V vs. RHE.

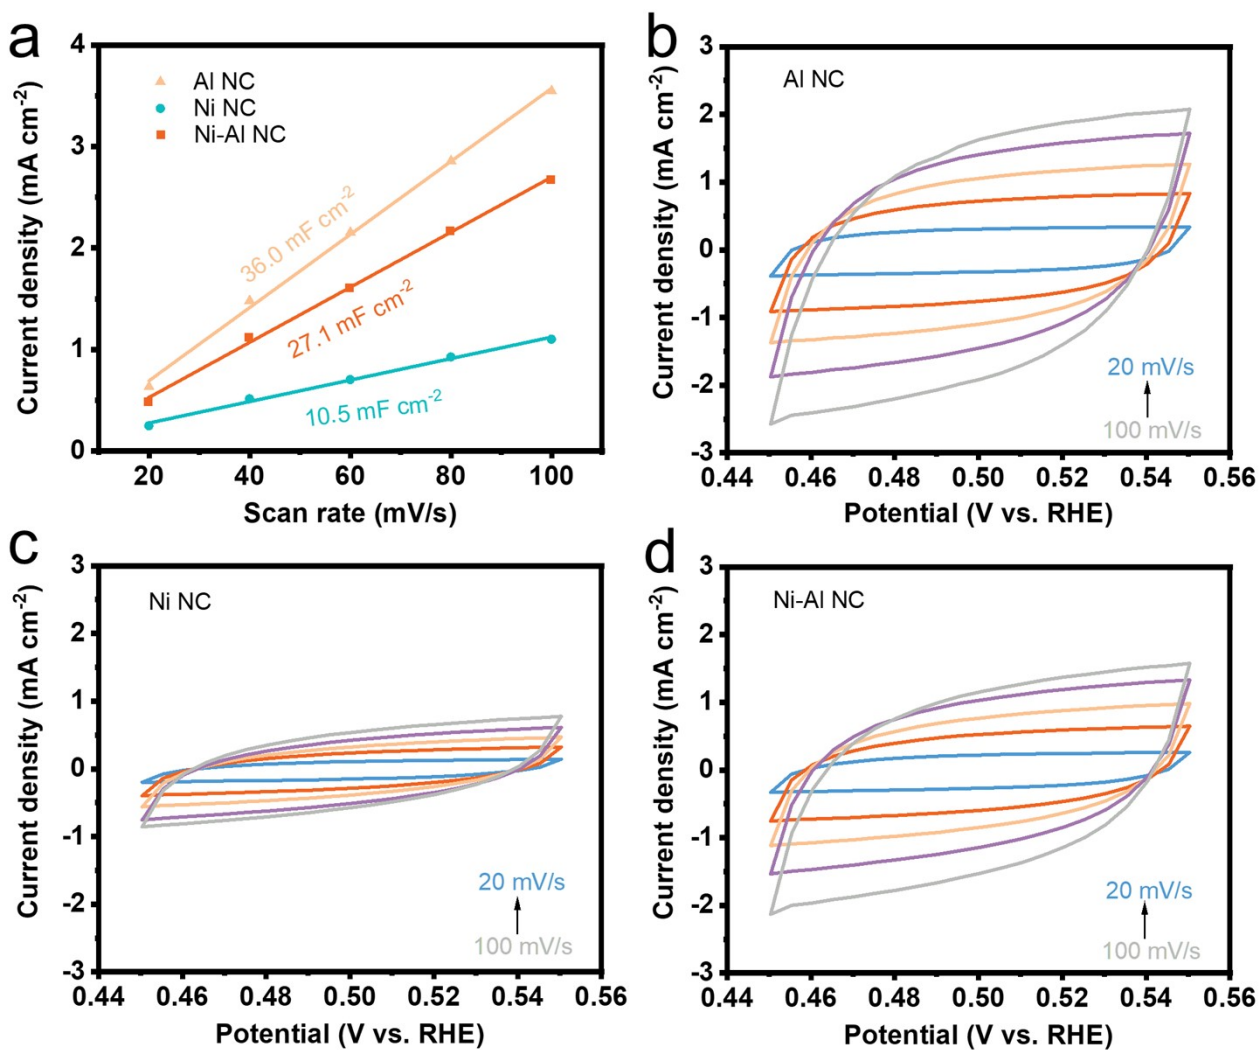

**Figure S9.** (a) Double layer capacitive currents plotted against scan rates performed in CO<sub>2</sub>-saturated 1.0 M KOH solution. Cyclic voltammograms of (b) Al NC, (c) Ni NC, and (d) Ni-Al NC at different scan rates (20, 40, 60, 80, and 100 mV/s).

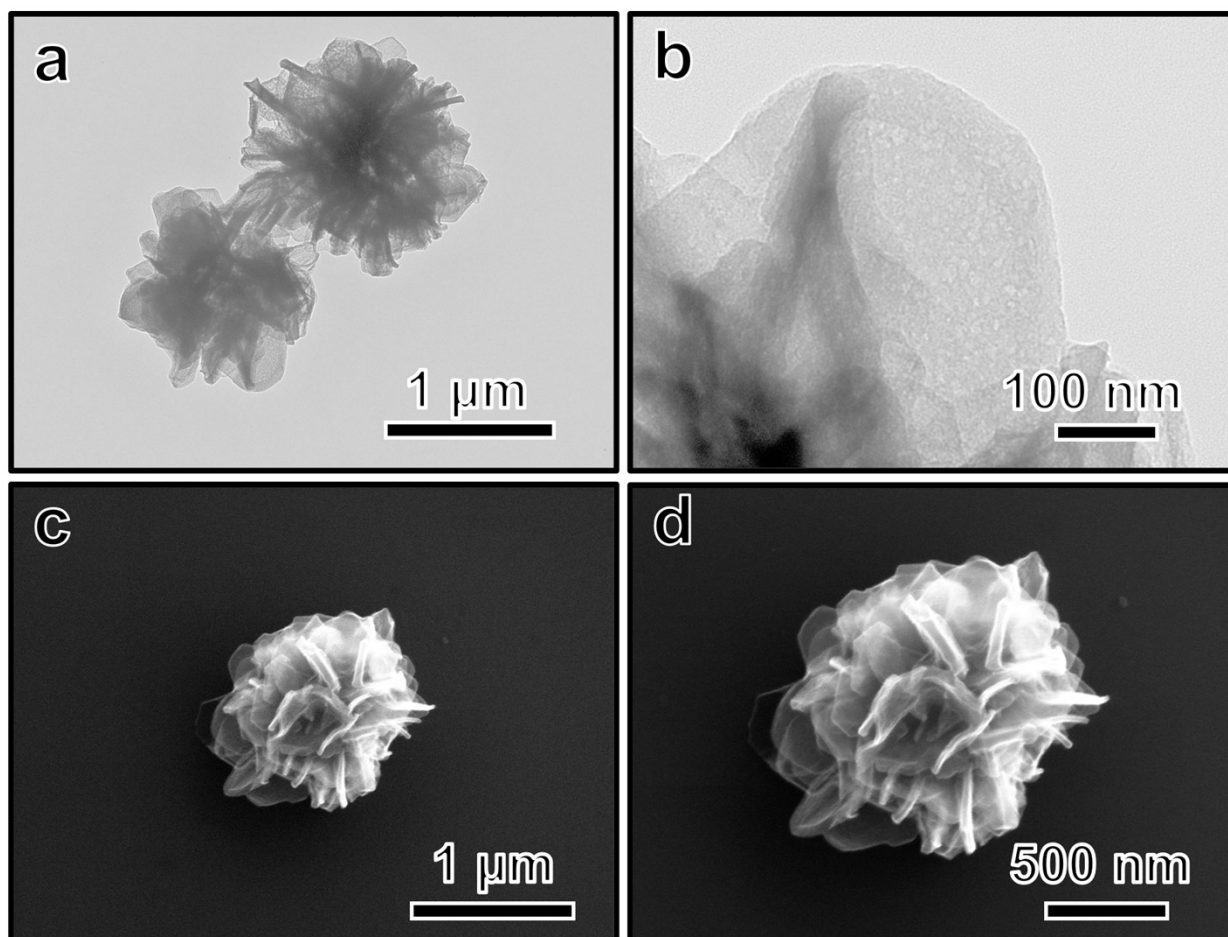

**Figure S10.** (a, b) TEM and (c, d) SEM images of the used Ni-Al NC.

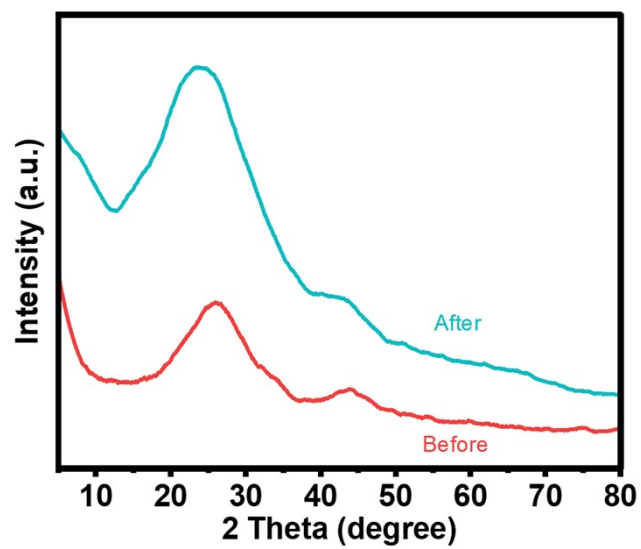

**Figure S11.** XRD patterns of Ni-Al NC catalyst before and after CO<sub>2</sub>RR.

**Table S1.** BET analysis results of samples.

| Catalysts | $S_{\text{BET}}$ (m <sup>2</sup> /g) <sup>a</sup> | $V_{\text{meso}}$ (cm <sup>3</sup> /g) <sup>b</sup> | $V_{\text{micro}}$ (cm <sup>3</sup> /g) <sup>c</sup> |
|-----------|---------------------------------------------------|-----------------------------------------------------|------------------------------------------------------|
| ZTF       | 251.4                                             | ~                                                   | 0.145                                                |
| NC        | 1209.9                                            | 0.557                                               | 0.365                                                |
| Al NC     | 697.7                                             | 0.552                                               | 0.236                                                |
| Ni NC     | 877.3                                             | 0.353                                               | 0.311                                                |
| Ni-Al NC  | 669.3                                             | 0.503                                               | 0.226                                                |

<sup>a</sup>:  $S_{\text{BET}}$  is BET specific surface area.

<sup>b</sup>:  $V_{\text{meso}}$  is the specific mesopore volume calculated from desorption isotherm by the BJH method.

<sup>c</sup>:  $V_{\text{micro}}$  is the specific micropore volume calculated by the *t*-plot method.

**Table S2.** Comparison between Ni-Al NC and other reported catalysts for CO<sub>2</sub>RR.

| Catalysts                                                | Electrolyte                   | FE <sub>CO</sub> /% | The potential of FE <sub>CO</sub> above 90% (vs. RHE) | j <sub>CO</sub> (mA cm <sup>-2</sup> ) | The potential range of CO (mV) | Ref.             |
|----------------------------------------------------------|-------------------------------|---------------------|-------------------------------------------------------|----------------------------------------|--------------------------------|------------------|
| <b>Ni-Al NC</b>                                          | <b>0.1 M KHCO<sub>3</sub></b> | <b>98</b>           | <b>- 0.7 to - 1.0</b>                                 | <b>14</b>                              | <b>300</b>                     | <b>This work</b> |
| Zn-N-G-800                                               | 0.5 M KHCO <sub>3</sub>       | 90.8                | - 0.5                                                 | 4                                      | ~                              | 1                |
| Zn <sub>94</sub> Cu <sub>6</sub>                         | 0.5 M KHCO <sub>3</sub>       | 90                  | - 0.8 to - 0.95                                       | 9 <sup>a</sup>                         | 150                            | 2                |
| [Au <sub>22</sub> H <sub>3</sub> ] <sup>3+</sup>         | 0.5 M KHCO <sub>3</sub>       | 92.7                | - 0.6                                                 | 5.4 <sup>a</sup>                       | ~                              | 3                |
| Ni NC@900                                                | 0.1 M KHCO <sub>3</sub>       | 96                  | - 0.8 to - 1.0                                        | 16.2 <sup>b</sup>                      | 200                            | 4                |
| 2-C16 Ag foil                                            | ~                             | 97                  | - 0.8                                                 | ~                                      | ~                              | 5                |
| NC@Ni/C-180                                              | 0.5 M KHCO <sub>3</sub>       | 97                  | - 0.7 to - 1.1                                        | 4.5 <sup>a</sup>                       | 400                            | 6                |
| 3D-h Cu-Sn                                               | 0.1 M KHCO <sub>3</sub>       | 98.6                | - 0.25 to - 0.6                                       | 0.5 <sup>a</sup>                       | 350                            | 7                |
| C-Bi <sub>3</sub> Pd <sub>97</sub> -SAA                  | 0.5 M KHCO <sub>3</sub>       | 91.5                | - 0.4 to - 0.5                                        | 0.6 <sup>b</sup>                       | 100                            | 8                |
| Pd <sub>2</sub> DAC                                      | 0.5 M KHCO <sub>3</sub>       | 98.2                | - 0.7 to - 0.85                                       | 6.76                                   | 150                            | 9                |
| Ni-N/NPCNSs                                              | 0.1 M KHCO <sub>3</sub>       | 90.7                | - 0.74                                                | 3.8 <sup>b</sup>                       | ~                              | 10               |
| FeN <sub>4</sub> Cl/NC-7.5                               | 0.5 M KHCO <sub>3</sub>       | 90.5                | - 0.6                                                 | 9.78                                   | ~                              | 11               |
| Ga-N <sub>3</sub> S-PC                                   | 0.5 M KHCO <sub>3</sub>       | 92                  | - 0.2 to - 0.3                                        | 18 <sup>a</sup>                        | 100                            | 12               |
| Cu-S <sub>1</sub> N <sub>3</sub> /Cu <sub>x</sub>        | 0.1 M KHCO <sub>3</sub>       | 100                 | - 0.55 to - 0.75                                      | 4 <sup>b</sup>                         | 200                            | 13               |
| Fe-N/P-C                                                 | 0.5 M KHCO <sub>3</sub>       | 98                  | - 0.4 to - 0.7                                        | 2 <sup>b</sup>                         | 300                            | 14               |
| O-Fe-N-C                                                 | 0.5 M NaHCO <sub>3</sub>      | 95                  | - 0.45 to - 0.5                                       | 4.2 <sup>b</sup>                       | 50                             | 15               |
| Ag-<br>ZnO/Ti <sub>3</sub> C <sub>2</sub> T <sub>x</sub> | 0.5 M KHCO <sub>3</sub>       | 98                  | - 0.87                                                | 22.59                                  | ~                              | 16               |
| V-CuInSe <sub>2</sub>                                    | 0.5 M KHCO <sub>3</sub>       | 91                  | - 0.7                                                 | 8.5 <sup>b</sup>                       | ~                              | 17               |

a This value is not mentioned in the article but is calculated from the current density and Faradaic efficiency.

b This value is not mentioned in the article but is derived from the graphical results.

## References

- 1 Z. Chen, K. Mou, S. Yao and L. Liu, *ChemSusChem*, 2018, **11**, 2944-2952.
- 2 P. Moreno-García, N. Schlegel, A. Zanetti, A. Cedeño López, M. a. d. J. s. Gálvez-Vázquez, A. Dutta, M. Rahaman and P. Broekmann, *ACS Applied Materials & Interfaces*, 2018, **10**, 31355-31365.
- 3 Z.-H. Gao, K. Wei, T. Wu, J. Dong, D.-e. Jiang, S. Sun and L.-S. Wang, *Journal of the American Chemical Society*, 2022, **144**, 5258-5262.
- 4 R. Daiyan, X. Lu, X. Tan, X. Zhu, R. Chen, S. C. Smith and R. Amal, *ACS Applied Energy Materials*, 2019, **2**, 8002-8009.
- 5 A. K. Buckley, T. Cheng, M. H. Oh, G. M. Su, J. Garrison, S. W. Utan, C. Zhu, F. D. Toste, W. A. Goddard III and F. M. Toma, *ACS Catalysis*, 2021, **11**, 9034-9042.
- 6 Q. Lu, C. Chen, Q. Di, W. Liu, X. Sun, Y. Tuo, Y. Zhou, Y. Pan, X. Feng and L. Li, *ACS Catalysis*, 2022, **12**, 1364-1374.
- 7 C. J. Yoo, W. J. Dong, J. Y. Park, J. W. Lim, S. Kim, K. S. Choi, F. O. Odongo Ngome, S.-Y. Choi and J.-L. Lee, *ACS Applied Energy Materials*, 2020, **3**, 4466-4473.
- 8 H. Xie, Y. Wan, X. Wang, J. Liang, G. Lu, T. Wang, G. Chai, N. M. Adli, C. Priest and Y. Huang, *Applied Catalysis B: Environmental*, 2021, **289**, 119783-119791.
- 9 N. Zhang, X. Zhang, Y. Kang, C. Ye, R. Jin, H. Yan, R. Lin, J. Yang, Q. Xu and Y. Wang, *Angewandte Chemie International Edition*, 2021, **133**, 13500-13505.
- 10 J. Pei, T. Wang, R. Sui, X. Zhang, D. Zhou, F. Qin, X. Zhao, Q. Liu, W. Yan and J. Dong, *Energy & Environmental Science*, 2021, **14**, 3019-3028.
- 11 Z. Li, R. Wu, S. Xiao, Y. Yang, L. Lai, J. S. Chen and Y. Chen, *Chemical Engineering Journal*, 2022, **430**, 132882-132890.
- 12 Z. Zhang, J. Zhu, S. Chen, W. Sun and D. Wang, *Angewandte Chemie International Edition*, 2023, **62**, e202215136.
- 13 D. Chen, L. H. Zhang, J. Du, H. Wang, J. Guo, J. Zhan, F. Li and F. Yu, *Angewandte Chemie International Edition*, 2021, **133**, 24224-24229.
- 14 K. Li, S. Zhang, X. Zhang, S. Liu, H. Jiang, T. Jiang, C. Shen, Y. Yu and W. Chen, *Nano Letters*, 2022, **22**, 1557-1565.
- 15 T. Zhang, X. Han, H. Liu, M. Biset-Peiró, J. Li, X. Zhang, P. Tang, B. Yang, L. Zheng and J.

- R. Morante, *Advanced Functional Materials*, 2022, **32**, 2111446-2111453.
- 16 Y. Hao, F. Hu, S. Zhu, Y. Sun, H. Wang, L. Wang, Y. Wang, J. Xue, Y.-F. Liao and M. Shao, *Angewandte Chemie International Edition*, 2023, e202304179.
- 17 J. Wang, X. Zheng, G. Wang, Y. Cao, W. Ding, J. Zhang, H. Wu, J. Ding, H. Hu and X. Han, *Advanced Materials*, 2022, **34**, 2106354-2106361.
